# Supplementary material for: Fast and noninvasive electronic nose for sniffing out COVID-19 based on exhaled breath-print recognition
Source: Research Square preprint supplement (doi:10.21203/rs.3.rs-750988/v1), 2021-07-26
Supplement: Supplementary file 1 [file 16c3dbabb1536dacf8f6d26f.docx]

Supplementary Information

**Fast and noninvasive electronic nose for sniffing out COVID-19 based on exhaled breath-print recognition**

**Dian Kesumapramudya Nurputra1,2,*, Ahmad Kusumaatmaja3, Mohamad Saifudin Hakim4, Shidiq Nur Hidayat3,5, Trisna Julian3,5, Budi Sumanto3, Yodi Mahendradhata6,7, Antonia Morita Iswari Saktiawati7,8, Hutomo Suryo Wasisto5,*, Kuwat Triyana3,***

1 Department of Child Health, Faculty of Medicine, Public Health and Nursing, Universitas Gadjah Mada, Jl. Farmako Sekip Utara, Yogyakarta 55281, Indonesia

2 Postgraduate Program in Clinical Medicine Science, Faculty of Medicine, Public Health and Nursing, Universitas Gadjah Mada, Jl. Farmako Sekip Utara, Yogyakarta 55281, Indonesia

3 Department of Physics, Faculty of Mathematics and Natural Sciences, Universitas Gadjah Mada, Sekip Utara PO Box BLS 21, Yogyakarta 55281, Indonesia

4 Department of Microbiology, Faculty of Medicine, Public Health and Nursing, Universitas Gadjah Mada, Jl. Farmako Sekip Utara, Yogyakarta 55281, Indonesia

5 PT Nanosense Instrument Indonesia, Umbulharjo, Yogyakarta 55167, Indonesia

6 Department of Health Policy and Management, Faculty of Medicine, Public Health and Nursing, Universitas Gadjah Mada, Yogyakarta, Indonesia

7 Center for Tropical Medicine, Faculty of Medicine, Public Health and Nursing, Universitas Gadjah Mada, Jl. Farmako Sekip Utara, Yogyakarta 55281, Indonesia

8 Department of Internal Medicine, Faculty of Medicine, Public Health and Nursing, Universitas Gadjah Mada, Jl. Farmako Sekip Utara, Yogyakarta 55281, Indonesia

* Corresponding authors.

E-mails: [dian.k.nurputra@ugm.ac.id](mailto:dian.k.nurputra@ugm.ac.id) (D.K.N.); [h.wasisto@nanosense-id.com](mailto:h.wasisto@nanosense-id.com) (H.S.W.); [triyana@ugm.ac.id](mailto:triyana@ugm.ac.id) (K.T.)

Contents

[1. Pre-conditioning of GeNose C19 to ambient air S-2](#_Toc78052940)

[2. GeNose C19 assessment toward acetone vapors S-3](#_Toc78052941)

[3. Effects of ambient temperature and humidity on sensor array S-4](#_Toc78052942)

[4. Principal component analysis (PCA) S-6](#_Toc78052943)

[5. Exhaled breath data processing steps S-7](#_Toc78052944)

[6. Non-parametric ANOVA test S-8](#_Toc78052945)

[7. Gas chromatography-mass spectroscopy (GC-MS) S-9](#_Toc78052946)

# Pre-conditioning of GeNose C19 to ambient air


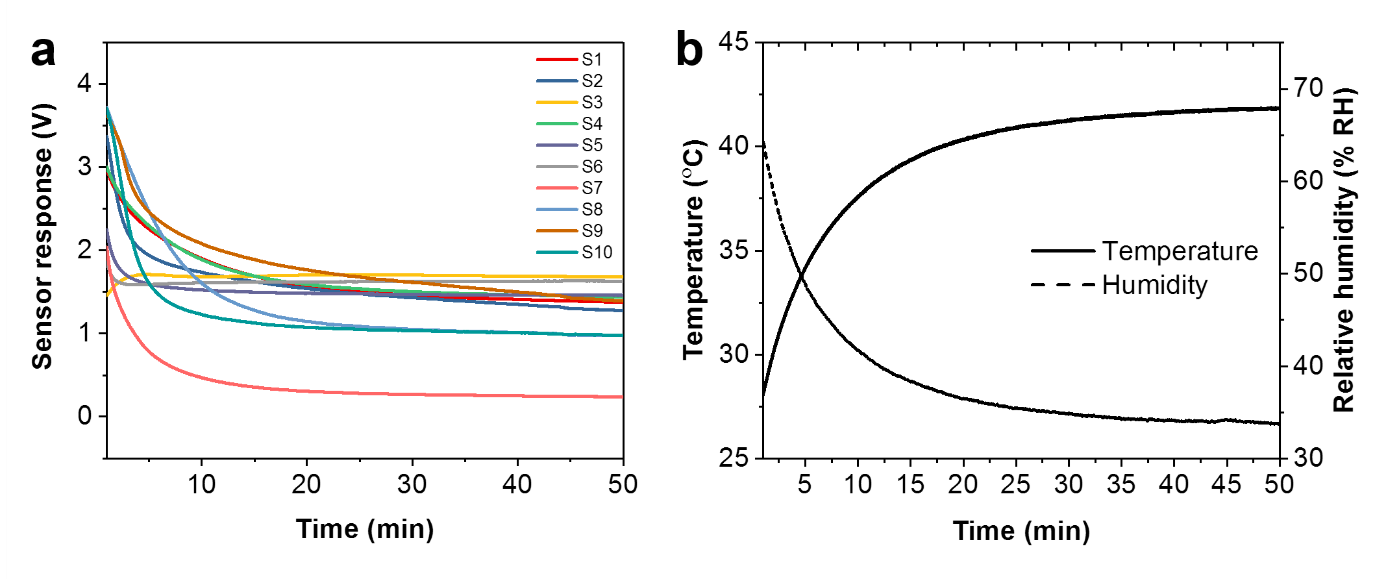


**Figure S1** **Pre-conditioning of GeNose C19.** **a** Real-time sensor array responses during preconditioning process where all the sensors are exposed to ambient air. **b** Measured temperature and humidity levels inside the gas chamber. All the sensors reach their stable conditions after being pre-heated for ~20 min. Each sensor possesses an internal heater that enables an activation temperature at a few hundred degrees Celsius.

# GeNose C19 assessment toward acetone vapors


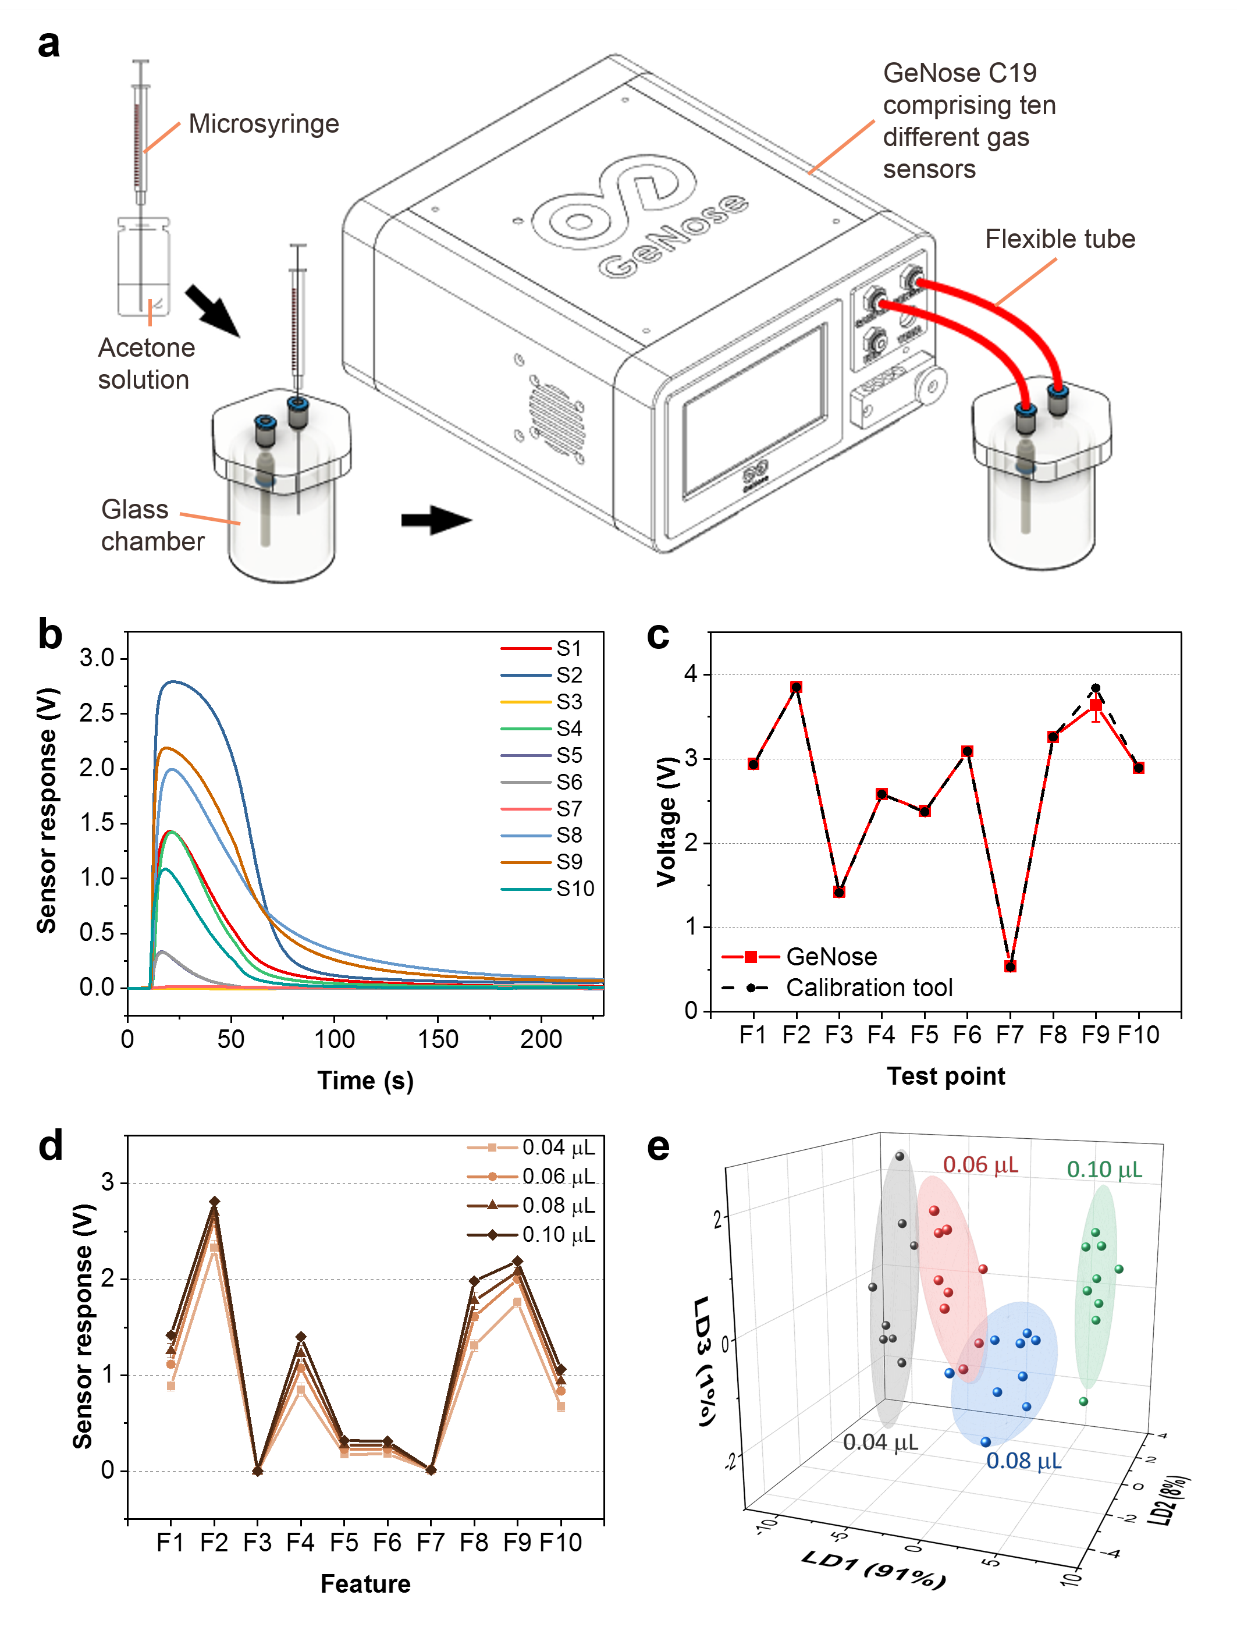


**Figure S2** **Exposure assessment of GeNose C19 to acetone vapors.** **a** Gas measurement setup for GeNose C19 assessment toward specific volatile organic compound (VOC). Acetone vapors were used as a VOC model, in which they were injected to the gas chamber using a 1 μL microsyringe. **b** Responses of ten different metal oxide semiconductor sensors (S1-S10) integrated in GeNose 19 system during their exposure to acetone vapors with a concentration of 0.10 µL. **c** Comparison of sensor signal readout between GeNose C19 and calibrated digital voltmeter. The extracted response features are defined as F1 – F10. **d** Sensor responses during exposure to acetone vapors with different concentrations (0.04 – 0.10 µL). Each vapor concentration was tested ten times to acquire quantitative values. **e** Classification of four different acetone vapor concentrations employing linear discriminant analysis (LDA).

# Effects of ambient temperature and humidity on sensor array


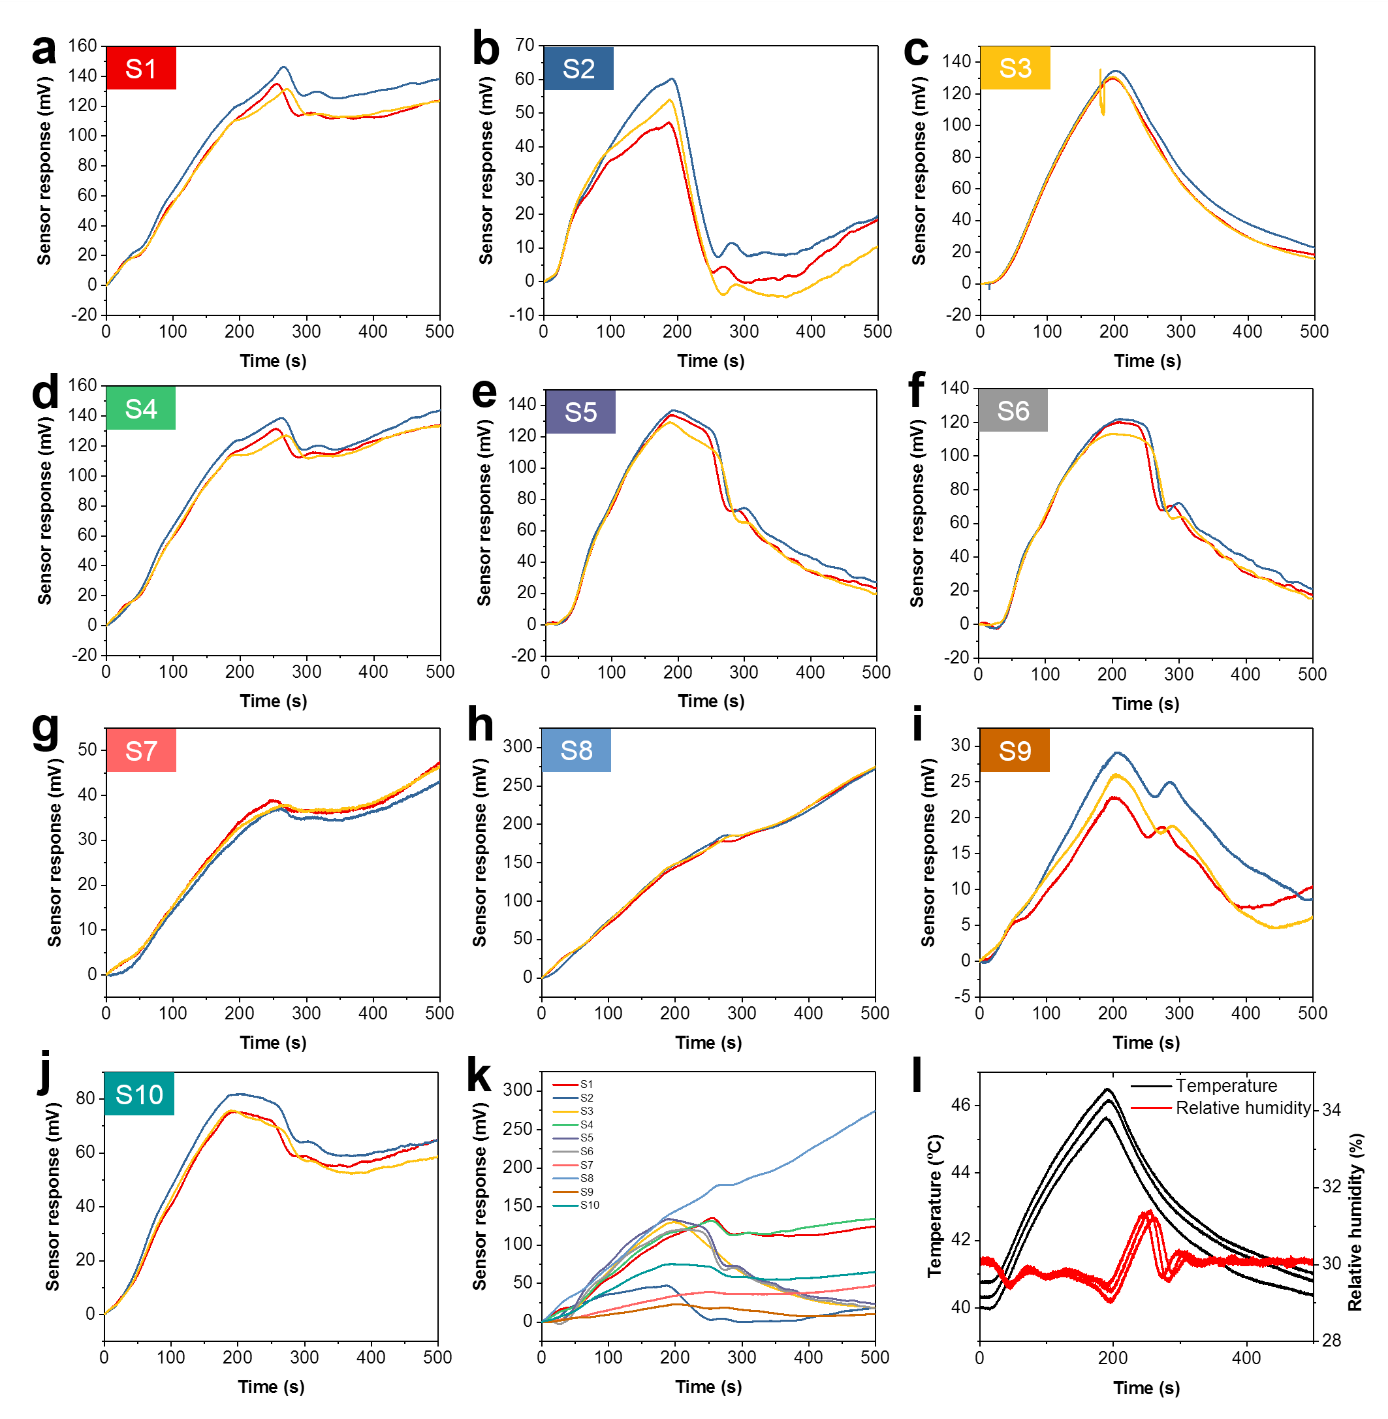


**Figure S3** **Cross-temperature test of GeNose C19.** **a-j** Responses of ten different gas sensors in GeNose C19 (S1 – S10) during cross-temperature tests. The temperature was modified in real time, while the humidity was kept at relative stable values. **k** Sensor array sensor signals during the first temperature test. **l** Temperature and humidity measured during cross-sensitivity assessment. From three repeated measurements, the sensors yield similar responses indicating their high sensing reproducibility.


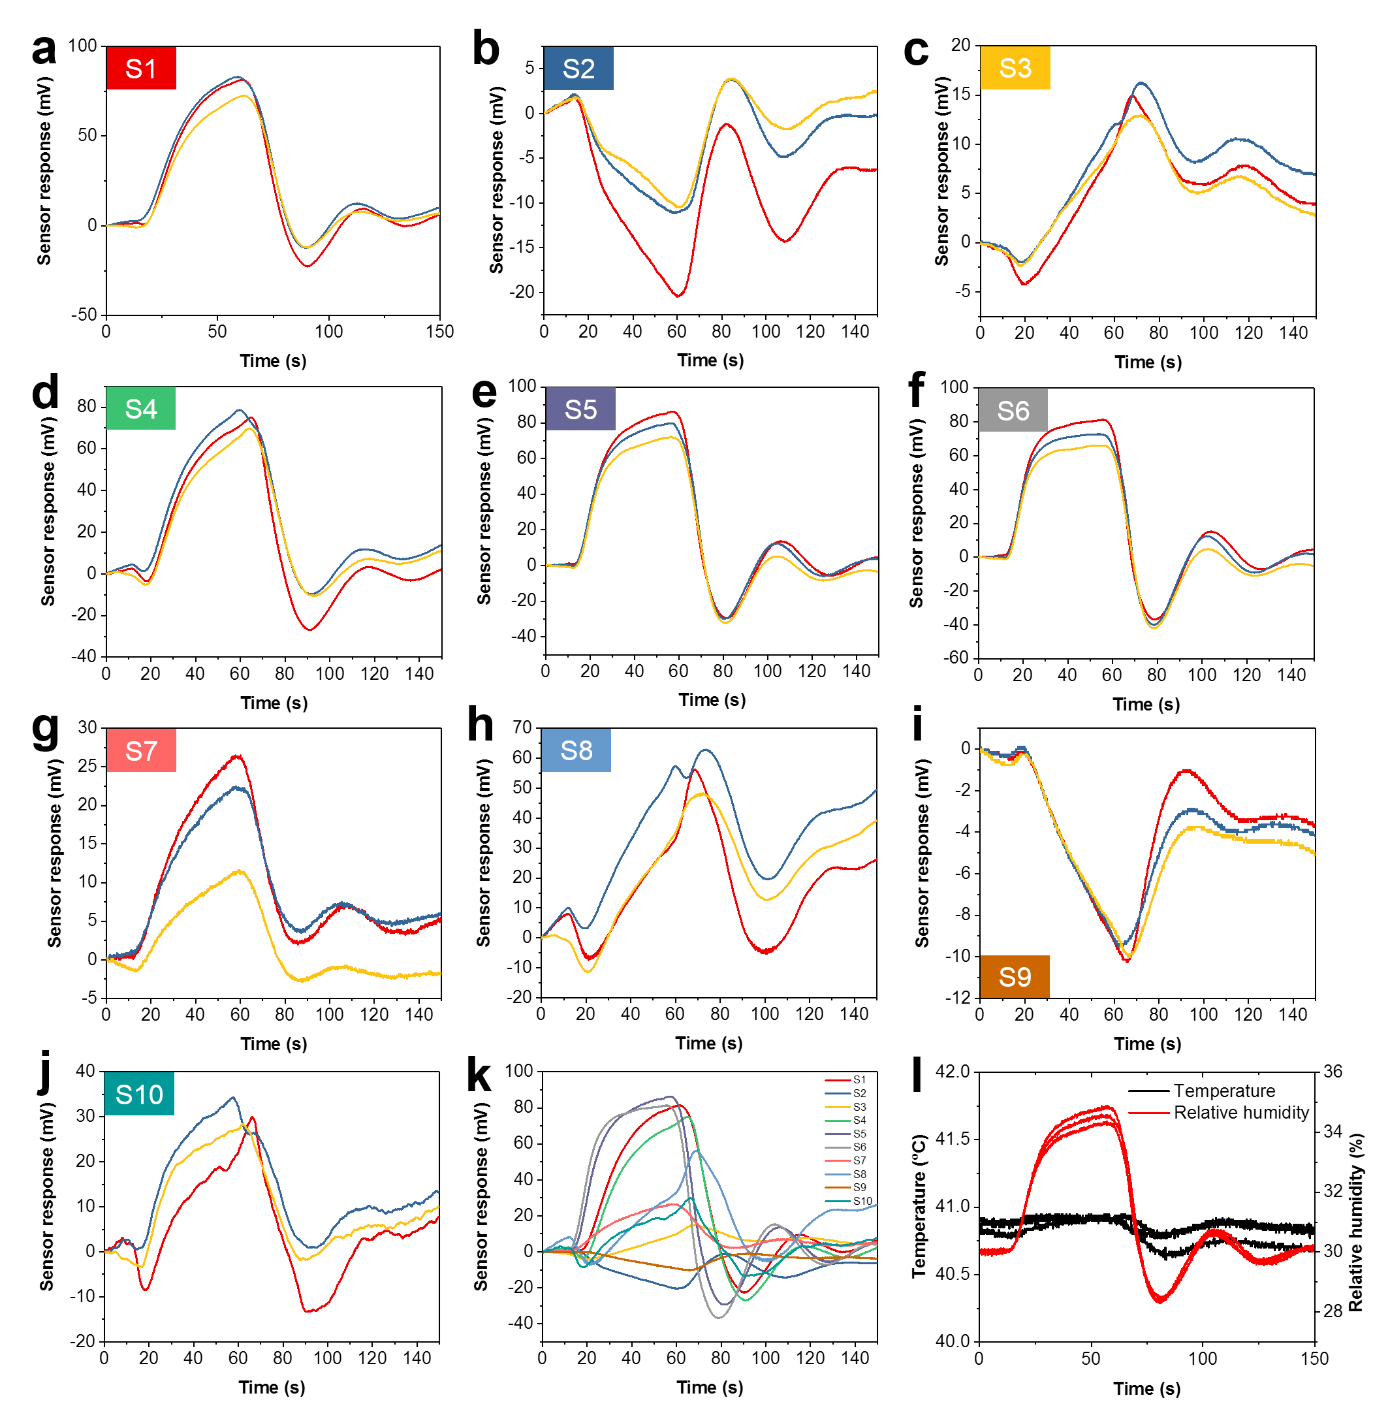


**Figure S4** **Cross-humidity test of GeNose C19. a-j** Responses of ten different gas sensors in GeNose C19 (S1 – S10) during cross-humidity tests. The humidity was modified in real time, while the temperature was kept at relative stable values. **k** Sensor array sensor signals during the first humidity test. **l** Temperature and humidity measured during cross-sensitivity assessment. From three repeated measurements, the sensors yielded similar responses indicating their reliable sensing results.

# Principal component analysis (PCA)


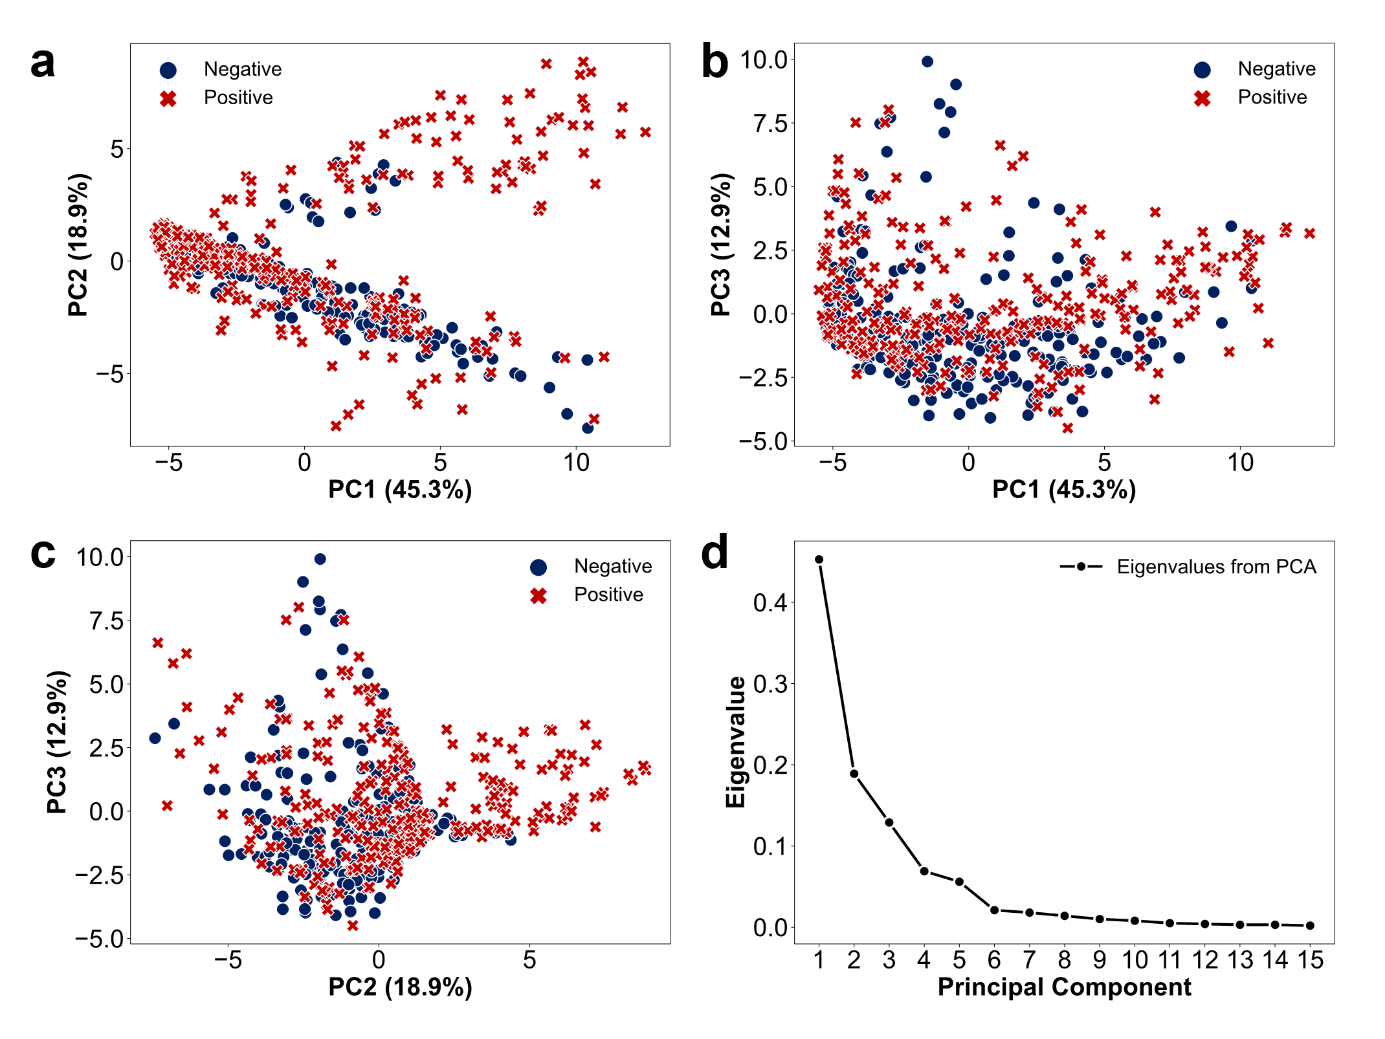


**Figure S5** **Principal component analysis (PCA) score plots of RT-qPCR-confirmed positive (red) and negative (blue) COVID-19.** **a** PC1 vs PC2, **b** PC2 vs PC3, **c** PC2 vs PC3, and **d** eigenvalues of 15 components.

# Exhaled breath data processing steps


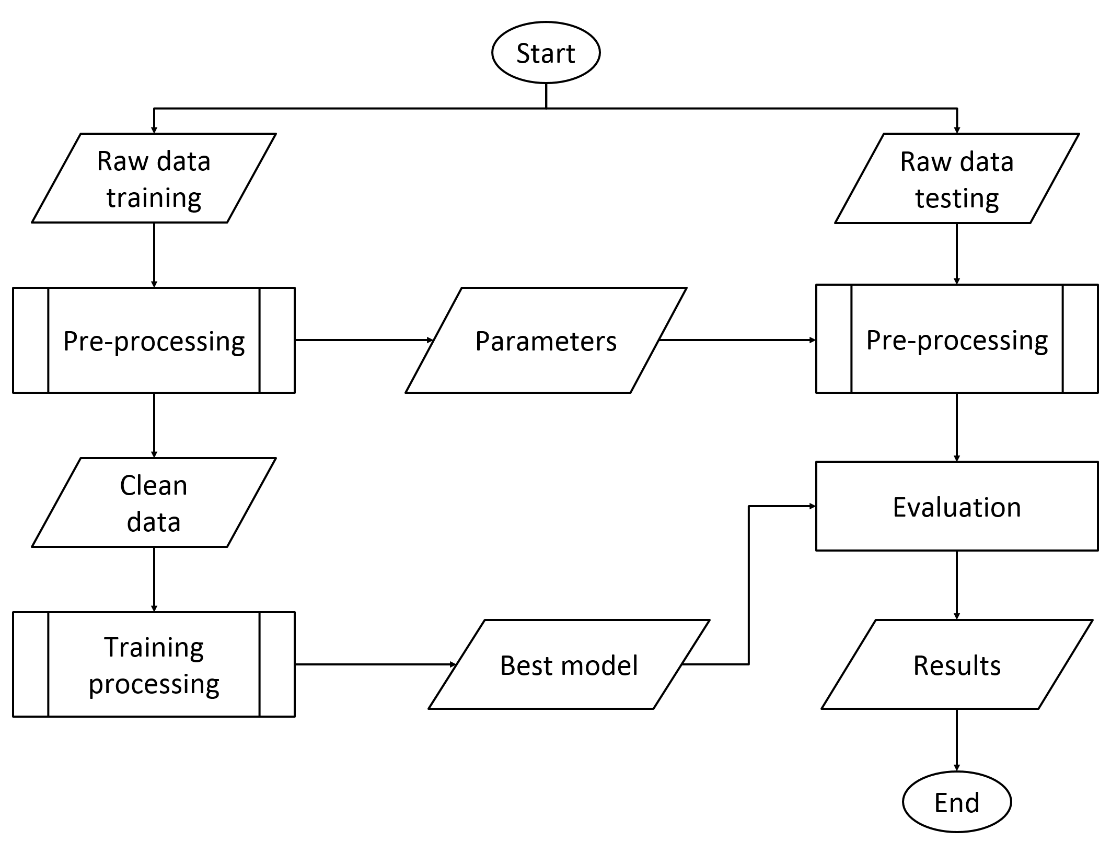


**Figure S6** **Block diagram of machine learning-based data processing steps used in GeNose C19 system.** Four different models (i.e., linear discriminant analysis (LDA), support vector machine (SVM), multilayer perceptron (MLP), and deep neural network (DNN)) were investigated to differentiate and classify the exhaled breath data.

# Non-parametric ANOVA test

**Table S1** **Non-parametric ANOVA test (Kruskal-Wallis test) of sensor responses towards exhaled breaths of positive and negative COVID-19 patients**. Four features (i.e., maximum, median, standard deviation, and variance) were extracted from responses of ten sensors (S1 – S10).

| **No.** | **Feature** | **Sensor** | **Positive** | | **Negative** | | **Statistic value** | ***p*-value** | **H0** |
| --- | --- | --- | --- | --- | --- | --- | --- | --- | --- |
| **Mean** | **Std** | **Mean** | **Std** |
| 1 | Maximum | **S1*** | 343.89 | 316.86 | 219.69 | 226.95 | 11.213 | 0.001 | Reject |
| 2 |  | S2 | 427.29 | 371.71 | 327.35 | 267.41 | 3.743 | 0.053 | Not-Reject |
| 3 |  | S3 | 146.14 | 204.64 | 142.49 | 145.08 | 2.874 | 0.09 | Not-Reject |
| 4 |  | S4 | 323.13 | 322.51 | 342.42 | 266.55 | 2.588 | 0.108 | Not-Reject |
| 5 |  | **S5*** | 304.14 | 300.57 | 402.78 | 289.35 | 21.32 | 0 | Reject |
| 6 |  | **S6*** | 129.91 | 156.77 | 72.23 | 93.91 | 20.304 | 0 | Reject |
| 7 |  | S7 | 265.48 | 248.51 | 224.64 | 220.64 | 1.341 | 0.247 | Not-Reject |
| 8 |  | S8 | 389.18 | 422.31 | 297.10 | 298.56 | 1.95 | 0.163 | Not-Reject |
| 9 |  | **S9*** | 517.61 | 473.33 | 205.67 | 241.83 | 41.745 | 0 | Reject |
| 10 |  | **S10*** | 215.68 | 332.79 | 53.34 | 70.28 | 35.381 | 0 | Reject |
| 11 | Median | **S1*** | 200.17 | 336.24 | 107.27 | 272.65 | 6.53 | 0.011 | Reject |
| 12 |  | S2 | 338.18 | 381.69 | 261.21 | 299.94 | 2.086 | 0.149 | Not-Reject |
| 13 |  | **S3*** | 38.24 | 195.17 | 56.38 | 194.44 | 8.202 | 0.004 | Reject |
| 14 |  | S4 | 243.63 | 267.12 | 261.70 | 226.76 | 2.494 | 0.114 | Not-Reject |
| 15 |  | **S5*** | 210.63 | 325.26 | 320.94 | 341.65 | 25.197 | 0 | Reject |
| 16 |  | S6 | 47.26 | 168.42 | 21.93 | 111.48 | 3.745 | 0.053 | Not-Reject |
| 17 |  | S7 | 143.54 | 250.47 | 107.76 | 287.07 | 0.225 | 0.635 | Not-Reject |
| 18 |  | S8 | 274.07 | 405.06 | 150.57 | 373.71 | 3.399 | 0.065 | Not-Reject |
| 19 |  | **S9*** | 367.83 | 480.54 | 106.08 | 286.46 | 23.252 | 0 | Reject |
| 20 |  | **S10*** | 147.77 | 293.67 | 24.54 | 77.82 | 15.207 | 0 | Reject |
| 21 | Standard deviation | **S1*** | 118.77 | 80.99 | 94.00 | 79.20 | 12.953 | 0 | Reject |
| 22 |  | S2 | 134.68 | 100.11 | 108.91 | 73.92 | 3.347 | 0.067 | Not-Reject |
| 23 |  | **S3*** | 47.46 | 50.34 | 51.87 | 50.46 | 7.259 | 0.007 | Reject |
| 24 |  | S4 | 93.36 | 84.73 | 107.23 | 86.28 | 2.88 | 0.09 | Not-Reject |
| 25 |  | **S5*** | 88.00 | 75.43 | 123.26 | 78.72 | 34.309 | 0 | Reject |
| 26 |  | **S6*** | 43.43 | 41.58 | 31.95 | 35.14 | 10.969 | 0.001 | Reject |
| 27 |  | S7 | 85.00 | 62.98 | 87.46 | 70.23 | 0.051 | 0.821 | Not-Reject |
| 28 |  | S8 | 111.67 | 101.97 | 114.84 | 81.48 | 3.68 | 0.055 | Not-Reject |
| 29 |  | **S9*** | 150.36 | 116.12 | 75.42 | 70.88 | 52.675 | 0 | Reject |
| 30 |  | **S10*** | 59.10 | 81.15 | 19.00 | 17.06 | 39.02 | 0 | Reject |
| 31 | Variance | **S1*** | 20665.89 | 26613.63 | 15108.07 | 28209.00 | 12.953 | 0 | Reject |
| 32 |  | S2 | 28160.64 | 34178.64 | 17325.57 | 21990.55 | 3.347 | 0.067 | Not-Reject |
| 33 |  | **S3*** | 4785.78 | 10405.56 | 5236.81 | 15701.41 | 7.259 | 0.007 | Reject |
| 34 |  | S4 | 15895.43 | 23890.76 | 18942.55 | 26418.83 | 2.88 | 0.09 | Not-Reject |
| 35 |  | **S5*** | 13433.46 | 23012.07 | 21389.87 | 25004.13 | 34.309 | 0 | Reject |
| 36 |  | **S6*** | 3615.11 | 8594.24 | 2255.90 | 9220.30 | 10.969 | 0.001 | Reject |
| 37 |  | S7 | 11190.39 | 15020.13 | 12581.33 | 22580.10 | 0.051 | 0.821 | Not-Reject |
| 38 |  | S8 | 22867.84 | 38770.38 | 19826.55 | 28451.64 | 3.68 | 0.055 | Not-Reject |
| 39 |  | **S9*** | 36092.04 | 46977.83 | 10712.47 | 23274.98 | 52.675 | 0 | Reject |
| 40 |  | **S10*** | 10077.74 | 30541.28 | 651.94 | 1479.80 | 39.02 | 0 | Reject |

# Gas chromatography-mass spectroscopy (GC-MS)

**Table S2** **Volatile organic compounds (VOCs) in the exhaled breaths of positive and negative COVID-19 patients measured by gas chromatography-mass spectroscopy (GC-MS).** Two sampled positive COVID-19 patients are indicated with N and S. Four investigated negative COVID-19 patients are written as R, K, NS, and SK.

|  | **Positive COVID-19 patients** | | | | | | **Negative COVID-19 patients** | | | | | | | | | | **Molecular formu-la** | **Volatile**  **Catego-ry** | **Detec-ted by Sen-sor** |
| --- | --- | --- | --- | --- | --- | --- | --- | --- | --- | --- | --- | --- | --- | --- | --- | --- | --- | --- | --- |
| **VOC Substances** | **N1** | **N2** | **N3** | **S1** | **S2** | **S3** | **R1** | **R2** | **R3** | **K1** | **K2** | **K3** | **NS1** | **NS2** | **SK1** | **SK2** |
| Hydrogen cyanide |  |  | **√** | **√** | **√** | **√** | **√** | **√** | **√** | **√** | **√** | **√** | **√** | **√** | **√** | **√** | [HCN](https://pubchem.ncbi.nlm.nih.gov/#query=HCN) | acid | S2, S6, S9 |
| Nitrogen | **√** | **√** | **√** | **√** | **√** | **√** | **√** | **√** | **√** | **√** | **√** | **√** | **√** | **√** | **√** | **√** | N2 |  |  |
| Carbon monoxide | **√** | **√** | **√** | **√** | **√** |  | **√** | **√** |  | **√** |  | **√** |  |  | **√** |  | CO |  | S1, S3, S4, S5, S6, S8 |
| Nickel tetracarbonyl | **√** |  |  | **√** |  | **√** |  |  | **√** |  |  | **√** |  | **√** | **√** | **√** | [C4NiO4](https://pubchem.ncbi.nlm.nih.gov/#query=C4NiO4) | carbon | S1, S3, S4, S5, S5, S6, S8 |
| butanedioic acid, 2-cyano-2,3-dimethyl-, diethyl ester |  | **√** |  |  |  |  | **√** |  |  |  |  |  |  |  |  |  | [C11H17NO4](https://pubchem.ncbi.nlm.nih.gov/#query=C11H17NO4) | Ester | S2, S9 |
| Manganese, acetylpentacarbonyl-, (OC-6-21)- | **√** |  |  |  |  |  |  |  |  | **√** |  |  |  |  |  |  | [C7H3MnO6-](https://pubchem.ncbi.nlm.nih.gov/#query=C7H3MnO6-) | Furan |  |
| Ethylene |  |  |  | **√** | **√** |  |  |  |  |  | **√** |  |  |  | **√** | **√** | [C2H4](https://pubchem.ncbi.nlm.nih.gov/#query=C2H4) | Hydrocarbon | S10 |
| Carbon monoxoide | **√** | **√** | **√** | **√** | **√** | **√** | **√** | **√** | **√** | **√** | **√** | **√** | **√** | **√** | **√** | **√** | CO |  | S1, S3, S4, S5, S6, S8 |
| Nitrogen | **√** | **√** | **√** |  |  |  |  | **√** |  |  |  |  |  |  |  |  | N2 |  |  |
| Ethylene | **√** | **√** | **√** |  |  |  |  |  |  |  |  | **√** |  |  |  |  | [C2H4](https://pubchem.ncbi.nlm.nih.gov/#query=C2H4) | Hydrocarbon | S10 |
| butanedioic acid, 2-cyano-2,3-dimethyl-, diethyl ester |  |  |  |  |  |  |  |  | **√** | **√** |  |  |  |  |  |  | [C11H17NO4](https://pubchem.ncbi.nlm.nih.gov/#query=C11H17NO4) | Ester | S2, S9 |
| Acetic acid, ethoxyhydroxy-, ethyl ester |  |  | **√** |  |  |  |  |  |  | **√** |  | **√** |  |  |  |  | [C10H18O3](https://pubchem.ncbi.nlm.nih.gov/#query=C10H18O3) | Ester | S2, S9 |
| Ethanol | **√** | **√** | **√** |  |  |  | **√** | **√** | **√** | **√** | **√** | **√** |  |  |  |  | [C2H6O](https://pubchem.ncbi.nlm.nih.gov/#query=C2H6O) | Alcohol | S1-S10 |
| Butyl aldoxime, 3-methyl-, syn- |  |  |  |  |  |  |  |  |  |  |  |  | **√** | **√** | **√** | **√** | [C5H11NO](https://pubchem.ncbi.nlm.nih.gov/#query=C5H11NO) | Hydrocarbon | S10 |
| Acetic acid, dimethoxy-, methyl ester |  |  |  |  |  |  |  |  |  |  | **√** |  |  |  |  |  | [C5H10O4](https://pubchem.ncbi.nlm.nih.gov/#query=C5H10O4) | Ester | S2, S9 |
| Cyclohexan-1,4,5-triol-3-one-1-carboxylic acid |  |  |  |  |  |  |  |  |  |  |  |  |  | **√** |  |  | [C7H10O6](https://pubchem.ncbi.nlm.nih.gov/#query=C7H10O6) | acid | S2, S9 |
| Acetic acid, anhydride with formic acid |  |  |  |  |  |  |  |  |  |  |  |  |  |  | **√** |  | [C10H18O3](https://pubchem.ncbi.nlm.nih.gov/#query=C10H18O3) | Ester | S2, S9 |
| Pyridine, 2-nitro- |  |  |  |  |  |  |  |  |  |  |  |  |  | **√** |  |  | [C5H4N2O2](https://pubchem.ncbi.nlm.nih.gov/#query=C5H4N2O2) | organic | S8,S9,S10 |
| Tetrahydropyrrole-3-ol-5-carboxylic acid, 1-acetyl-, methyl ester |  |  |  |  |  |  |  |  |  |  |  |  | **√** |  |  |  | [C10H14O3](https://pubchem.ncbi.nlm.nih.gov/#query=C10H14O3) | Ester | S2,S9 |
| cis-3-Butyl-4-vinyl-cyclopentene |  |  |  |  |  |  |  |  |  |  |  |  |  | **√** |  |  | [C11H18](https://pubchem.ncbi.nlm.nih.gov/#query=C11H18) | Hydrocarbon | S10 |
| Bicyclo[2.2.1]heptane, 2,2-dimethyl-3-methylene-, (1S)- |  |  |  |  |  |  | **√** | **√** | **√** | **√** |  | **√** | **√** | **√** | **√** | **√** | [C10H16](https://pubchem.ncbi.nlm.nih.gov/#query=C10H16) | Hydrocarbon | S10 |
| 2,4-Heptadien-6-ynal, (E,E)- |  |  |  |  |  |  |  |  |  |  |  |  |  | **√** |  |  | [C7H6O](https://pubchem.ncbi.nlm.nih.gov/#query=C7H6O) | Hydrocarbon | S10 |
| Decane, 2,6,8-trimethyl- |  |  |  |  |  |  |  |  |  |  |  |  | **√** | **√** | **√** | **√** | [C13H28](https://pubchem.ncbi.nlm.nih.gov/#query=C13H28) | Hydrocarbon | S10 |
| Heptane, 2,2-dimethyl- |  |  |  |  |  |  | **√** |  |  |  |  |  |  |  |  |  | [C10H16](https://pubchem.ncbi.nlm.nih.gov/#query=C10H16) | Hydrocarbon | S10 |
| Oxalic acid, bis(isobutyl) ester |  |  |  |  |  |  |  |  | **√** |  |  |  |  |  |  |  | [C10H18O4](https://pubchem.ncbi.nlm.nih.gov/#query=C10H18O4) | Ester | S2,S9 |
| Cyclotetrasiloxane, octamethyl- |  |  |  |  |  |  |  |  |  | **√** |  |  |  |  |  |  | [C8H24O4Si4](https://pubchem.ncbi.nlm.nih.gov/#query=C8H24O4Si4) | Hydrocarbon | S10 |
| Benzene, [(1-methyl-2-propenyl)oxy]- |  |  |  |  |  |  |  |  |  |  |  |  | **√** | **√** | **√** | **√** | [C14H18O2](https://pubchem.ncbi.nlm.nih.gov/#query=C14H18O2) | Hydrocarbon | S10 |
| 1-Cyclopentene-1-propanoic acid, 2-[3,7-bis[(trimethylsilyl)oxy]-1-octenyl]-5-oxo-, methyl ester | **√** |  |  |  |  |  |  |  |  |  |  |  |  |  |  |  | [C23H42O5Si2](https://pubchem.ncbi.nlm.nih.gov/#query=C23H42O5Si2) | Ester | S2,S9 |
| Benzoic acid, hydrazide |  |  |  |  |  |  |  |  |  |  |  |  | **√** | **√** | **√** | **√** | [C7H8N2O](https://pubchem.ncbi.nlm.nih.gov/#query=C7H8N2O) | Ester | S2,S9 |
| 3-Hydroxymandelic acid, ethyl ester, di-TMS |  |  |  |  |  |  |  |  |  |  |  |  | **√** | **√** |  |  | [C16H28O4Si2](https://pubchem.ncbi.nlm.nih.gov/#query=C16H28O4Si2) | Ester | S2,S9 |
| 2,5-Dihydroxybenzaldehyde, 2TMS derivative | **√** | **√** | **√** | **√** | **√** | **√** | **√** | **√** | **√** | **√** | **√** | **√** |  |  |  |  | [C13H22O3Si2](https://pubchem.ncbi.nlm.nih.gov/#query=C13H22O3Si2) | Aldehyde | S2 |
| Isobornyl thiocyanoacetate | **√** |  |  |  |  |  |  |  |  |  |  |  |  |  | **√** |  | [C13H19NO2S](https://pubchem.ncbi.nlm.nih.gov/#query=C13H19NO2S) | Hydrocarbon | S10 |
| 1-Nonadecanol, TMS derivative | **√** | **√** | **√** | **√** | **√** | **√** | **√** | **√** | **√** | **√** | **√** | **√** |  |  |  |  | C22H48OSi | Alcohol | S1-S10 |
| 3,7,11,15-tetramethylhexadecan-1,2,3-triol silylated |  |  |  |  |  |  |  |  |  |  |  |  | **√** |  |  |  | [C20H40O](https://pubchem.ncbi.nlm.nih.gov/#query=C20H40O) | Alcohol | S1-S10 |
| Silane, dimethyl |  |  | **√** |  |  | **√** |  |  |  | **√** |  |  |  |  |  |  | [C22H34O3Si2](https://pubchem.ncbi.nlm.nih.gov/#query=C22H34O3Si2) | Hydrocarbon | S10 |
| Bicyclo[2.2.1]heptane, 2-chloro-2,3,3-trimethyl- |  |  |  |  |  |  |  |  |  |  |  |  |  | **√** |  |  | [C10H17Cl](https://pubchem.ncbi.nlm.nih.gov/#query=C10H17Cl) | Hydrocarbon | S10 |
| Cyclohexanol, 2-methyl-3-(1-methylethenyl)-, acetate, (1a,2a,3a)- |  |  |  |  |  |  |  |  |  |  |  |  |  | **√** | **√** |  | [C12H20O2](https://pubchem.ncbi.nlm.nih.gov/#query=C12H20O2) | acid | S2,S9 |
| 3-Isopropoxy-1,1,1,7,7,7-hexamethyl-3,5,5-tris(trimethylsiloxy)tetrasiloxane | **√** | **√** | **√** | **√** | **√** | **√** | **√** | **√** | **√** | **√** | **√** | **√** | **√** | **√** | **√** | **√** | [C18H52O7Si7](https://pubchem.ncbi.nlm.nih.gov/#query=C18H52O7Si7) | Hydrocarbon | S10 |
| Molybdenum, tricarbonyl-?-6-spiro[1,3-dioxolane-2,1'-benzocyclobutene) | **√** |  |  |  |  |  |  |  |  |  |  |  |  |  |  |  | [C17H28O2](https://pubchem.ncbi.nlm.nih.gov/#query=C17H28O2) | Hydrocarbon | S10 |
| 3-Butoxy-1,1,1,7,7,7-hexamethyl-3,5,5-tris(trimethylsiloxy)tetrasiloxane |  |  |  |  |  |  | **√** | **√** | **√** | **√** | **√** | **√** |  |  | **√** | **√** | [C17H50O7Si7](https://pubchem.ncbi.nlm.nih.gov/#query=C17H50O7Si7) | Hydrocarbon | S10 |
| 1-[2,4-Bis(trimethylsiloxy)phenyl]-2-[(4-trimethylsiloxy)phenyl]propan-1-one |  |  |  |  |  |  |  |  |  | **√** | **√** | **√** |  |  |  |  | [C24H38O4Si3](https://pubchem.ncbi.nlm.nih.gov/#query=C24H38O4Si3) | Hydrocarbon | S10 |
| Phenol, 2-benzyloxy-3,6-difluoro- |  |  |  |  |  |  | **√** |  |  | **√** |  |  |  |  |  |  | [C13H12O2](https://pubchem.ncbi.nlm.nih.gov/#query=C13H12O2) | Alcohol | S1-S10 |
